# Supplementary material for: Investigation of perfluorinated compounds (PFCs) in mollusks from coastal waters in the Bohai Sea of China
Source: Royal Society of Chemistry journal article supplement (doi:10.1039/b909302h), 2009-10-14
Supplement: b909302h.pdf [file b909302h.pdf]

SUPPLEMENTARY MATERIAL

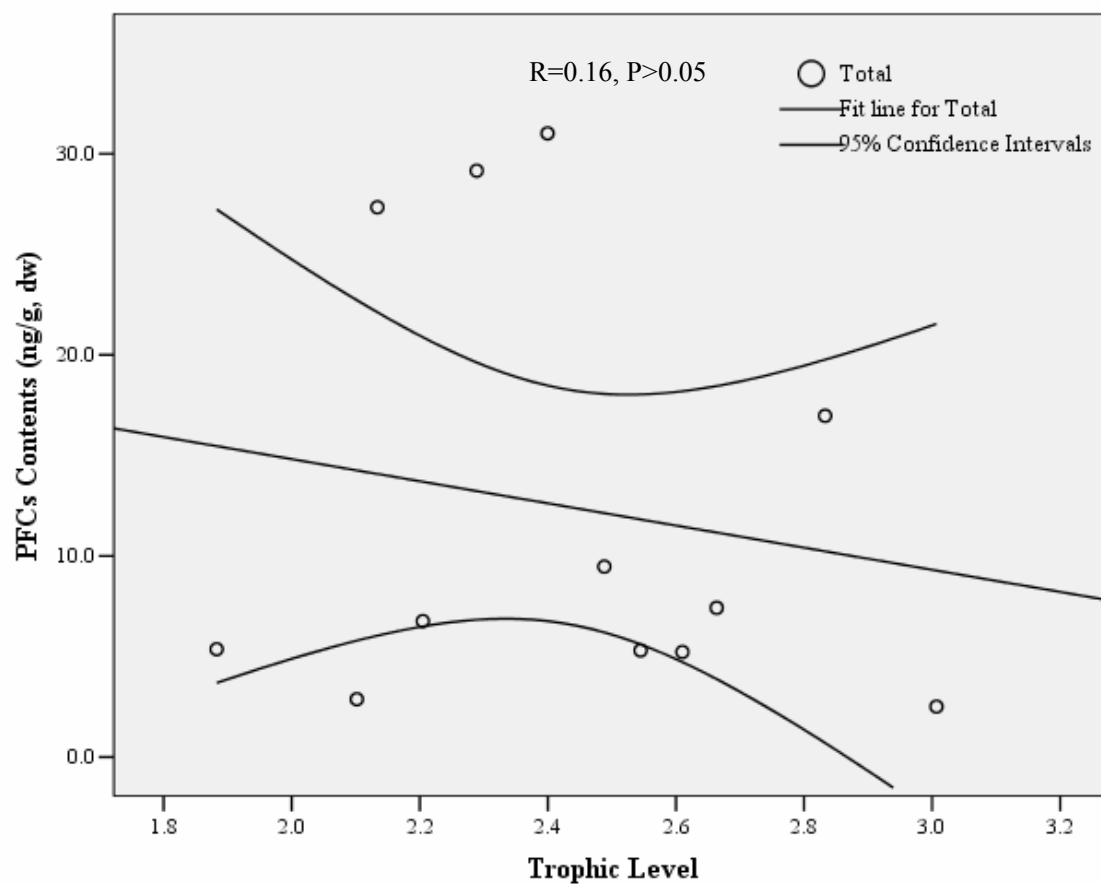

**Fig. S1.** The relationship between the concentrations of PFCs and the trophic level (TL) of mollusks

Table S1. PFC concentrations in each mollusk samples from Bohai Sea region (ng/g, dry wt) (collected in 2006, S-small, L-large)

| Species                     | Site   | PFOA | PFOS  | PFHpA | PFDA | PFUnDA |
|-----------------------------|--------|------|-------|-------|------|--------|
| <i>Meretrix meretrix</i>    | DL     | 13.5 | 0.40  | <0.5  | <0.5 | <0.5   |
| <i>Linnaeus</i>             |        |      |       |       |      |        |
|                             | YK(S)  | 3.20 | <0.17 | 3.89  | <0.5 | <0.5   |
|                             | YK(L)  | 24.8 | 0.18  | 34.8  | 2.94 | <0.5   |
|                             | HLD(S) | <0.5 | 0.32  | <0.5  | <0.5 | <0.5   |
|                             | HLD(L) | 0.54 | <0.17 | 0.51  | <0.5 | <0.5   |
|                             | TJ     | 4.07 | <0.17 | <0.5  | <0.5 | <0.5   |
|                             | SG     | 57.9 | 1.44  | 0.78  | 1.04 | 0.52   |
|                             | SG-2   | 69.1 | <0.17 | 1.60  | <0.5 | <0.5   |
|                             | PL     | 9.38 | <0.17 | 15.7  | 1.87 | <0.5   |
|                             | YT     | 14.6 | 0.24  | 5.22  | <0.5 | 0.56   |
|                             | WH     | <0.5 | <0.17 | <0.5  | <0.5 | <0.5   |
| <i>Scapharca subcrenata</i> | DL     | 19.1 | 0.36  | <0.5  | <0.5 | 0.65   |
|                             | YK     | 5.89 | 0.53  | <0.5  | <0.5 | 0.58   |
|                             | HLD    | 2.16 | <0.17 | <0.5  | <0.5 | <0.5   |
|                             | BDH    | 15.7 | 2.78  | <0.5  | 1.31 | <0.5   |
|                             | TJ     | 2.73 | 0.44  | <0.5  | <0.5 | <0.5   |
|                             | SG     | 110  | 0.82  | <0.5  | 2.06 | 0.75   |
|                             | YT     | 3.10 | 0.50  | <0.5  | <0.5 | 0.66   |
|                             | WH     | 6.67 | <0.17 | <0.5  | <0.5 | 0.50   |
| <i>Rapana venosa</i>        | DL     | <0.5 | <0.17 | <0.5  | <0.5 | <0.5   |
|                             | YK(S)  | 0.90 | 0.30  | 0.90  | <0.5 | <0.5   |
|                             | BDH    | 0.61 | 0.37  | 0.70  | <0.5 | <0.5   |
|                             | BDH-2  | 33.0 | <0.17 | 1.46  | 3.43 | <0.5   |
|                             | HLD(L) | 0.82 | <0.17 | <0.5  | <0.5 | <0.5   |
|                             | HLD(S) | 0.59 | <0.17 | 1.12  | <0.5 | <0.5   |
|                             | TJ     | <0.5 | 0.38  | <0.5  | <0.5 | <0.5   |
|                             | TJ(L)  | <0.5 | <0.17 | <0.5  | <0.5 | <0.5   |
|                             | SG     | 3.18 | 0.50  | <0.5  | <0.5 | <0.5   |
|                             | YK     | 0.51 | <0.17 | <0.5  | <0.5 | <0.5   |
|                             | PL     | <0.5 | 0.58  | <0.5  | <0.5 | <0.5   |
|                             | YT     | <0.5 | 0.30  | <0.5  | <0.5 | <0.5   |
|                             | WH     | <0.5 | <0.17 | <0.5  | <0.5 | <0.5   |
| <i>Neverita didyma</i>      | DL     | <0.5 | <0.17 | <0.5  | <0.5 | <0.5   |
|                             | HLD    | 44.9 | 0.18  | <0.5  | 3.15 | 0.71   |
|                             | BDH    | <0.5 | 1.48  | <0.5  | <0.5 | <0.5   |
|                             | TJ     | <0.5 | 0.46  | <0.5  | <0.5 | <0.5   |

|                       |       |      |       |      |      |      |
|-----------------------|-------|------|-------|------|------|------|
|                       | SG    | 126  | 3.10  | <0.5 | 3.17 | 1.69 |
|                       | SG    | 19.0 | 1.43  | <0.5 | 2.05 | 1.26 |
|                       | PL(S) | <0.5 | 0.53  | <0.5 | <0.5 | <0.5 |
|                       | PL    | <0.5 | 0.52  | <0.5 | <0.5 | <0.5 |
|                       | YT(S) | <0.5 | 1.00  | <0.5 | <0.5 | 1.01 |
|                       | YT    | 0.55 | 0.37  | <0.5 | <0.5 | <0.5 |
|                       | WH    | <0.5 | 0.94  | <0.5 | <0.5 | 0.90 |
|                       | WH(S) | <0.5 | <0.17 | <0.5 | <0.5 | <0.5 |
| <i>Mytilus edulis</i> | DL(S) | 0.78 | <0.17 | <0.5 | <0.5 | <0.5 |
|                       | DL(L) | 1.29 | <0.17 | <0.5 | 0.60 | 0.97 |
|                       | YK    | 0.96 | 0.42  | <0.5 | <0.5 | <0.5 |
|                       | HLD   | <0.5 | <0.17 | <0.5 | <0.5 | <0.5 |
|                       | BDH   | 0.85 | <0.17 | <0.5 | <0.5 | <0.5 |
|                       | TJ    | 0.75 | 0.55  | <0.5 | <0.5 | <0.5 |
|                       | PL    | 1.14 | 0.53  | <0.5 | <0.5 | <0.5 |
|                       | YT    | 2.05 | 0.34  | <0.5 | <0.5 | <0.5 |

Table S2. PFC concentrations in each mollusk samples from Bohai Sea region (ng/g, dry wt) (collected in 2007, S-small, L-large)

| Species                                     | Site  | PFOA  | PFOS  | PFHpA | PFDA | PFUnDA |
|---------------------------------------------|-------|-------|-------|-------|------|--------|
| <i>Meretrix meretrix</i><br><i>Linnaeus</i> | DL    | 1.04  | <0.17 | 1.00  | <0.5 | <0.5   |
|                                             | YK    | 2.24  | <0.17 | <0.5  | <0.5 | <0.5   |
|                                             | HLD   | 2.05  | 0.28  | 1.00  | <0.5 | <0.5   |
|                                             | BDH   | 1.82  | 0.38  | 1.50  | <0.5 | <0.5   |
|                                             | TJ    | 0.85  | <0.17 | <0.5  | <0.5 | <0.5   |
|                                             | SG(L) | 24.3  | 0.49  | 1.20  | <0.5 | <0.5   |
|                                             | SG(S) | 25.3  | 0.36  | 1.59  | 0.54 | 0.50   |
|                                             | YT(L) | 12.1  | <0.17 | <0.5  | <0.5 | <0.5   |
|                                             | YT(S) | 9.51  | 0.27  | <0.5  | <0.5 | <0.5   |
|                                             | WH(S) | 1.29  | 0.25  | 1.02  | <0.5 | <0.5   |
|                                             | WH(L) | <0.5  | <0.17 | <0.5  | <0.5 | <0.5   |
|                                             | WH(S) | 2.860 | <0.17 | 2.00  | <0.5 | <0.5   |
| <i>Mactra veneriformis</i>                  | DL    | <0.5  | 0.76  | <0.5  | <0.5 | 0.69   |
|                                             | YK    | 84.0  | 1.97  | 0.84  | 1.26 | <0.5   |
|                                             | HLD   | 2.43  | 0.72  | 2.25  | <0.5 | <0.5   |
|                                             | BDH   | 1.63  | 1.07  | 0.63  | <0.5 | <0.5   |
|                                             | SG    | 19.4  | 1.32  | <0.5  | 1.18 | 0.83   |
|                                             | PL    | 111   | 2.56  | 2.64  | 1.50 | 0.56   |
|                                             | WH    | <0.5  | 0.30  | <0.5  | <0.5 | <0.5   |
| <i>Scapharca subcrenata</i>                 | DL    | 4.49  | 0.25  | <0.5  | <0.5 | <0.5   |
|                                             | YK    | 6.48  | 0.27  | 0.83  | <0.5 | 0.84   |
|                                             | HLD   | 11.6  | 0.58  | 5.00  | 1.10 | <0.5   |
|                                             | BDH   | 3.14  | 0.84  | 1.11  | <0.5 | <0.5   |
|                                             | TJ    | 3.46  | 0.29  | <0.5  | <0.5 | <0.5   |
|                                             | SG    | 40.5  | 1.39  | 4.26  | 1.74 | 1.28   |
|                                             | PL    | 1.78  | 0.25  | <0.5  | <0.5 | <0.5   |
|                                             | YT    | 17.8  | 0.19  | <0.5  | <0.5 | <0.5   |
|                                             | WH    | 0.44  | 0.45  | <0.5  | <0.5 | 0.55   |
| <i>Crassostrea talienwhanensis</i>          | DL    | <0.5  | 0.71  | <0.5  | <0.5 | 0.59   |
|                                             | YK    | <0.5  | 0.64  | <0.5  | <0.5 | <0.5   |
|                                             | HLD   | 0.81  | <0.17 | 2.02  | <0.5 | <0.5   |
|                                             | BDH   | 0.51  | 0.27  | 0.53  | <0.5 | <0.5   |
|                                             | TJ    | <0.5  | 3.82  | <0.5  | <0.5 | <0.5   |

|                        |       |      |       |      |      |      |
|------------------------|-------|------|-------|------|------|------|
|                        | SG    | 0.74 | 0.27  | 0.82 | 0.55 | <0.5 |
|                        | PL    | <0.5 | <0.17 | <0.5 | <0.5 | <0.5 |
|                        | YT    | 11.1 | 0.26  | <0.5 | 1.65 | <0.5 |
|                        | WH    | 0.78 | <0.17 | 1.23 | <0.5 | <0.5 |
| <i>Rapana venosa</i>   | DL    | <0.5 | 0.22  | 0.56 | <0.5 | <0.5 |
|                        | YK    | <0.5 | <0.17 | <0.5 | <0.5 | <0.5 |
|                        | HLD   | 0.94 | <0.17 | 0.96 | <0.5 | <0.5 |
|                        | BDH   | 0.83 | <0.17 | 1.04 | <0.5 | <0.5 |
|                        | TJ    | <0.5 | <0.17 | <0.5 | <0.5 | <0.5 |
|                        | SG(L) | 1.38 | <0.17 | <0.5 | <0.5 | <0.5 |
|                        | SG(S) | 8.34 | 0.58  | <0.5 | 0.80 | <0.5 |
|                        | PL(S) | 0.99 | <0.17 | 0.84 | <0.5 | <0.5 |
|                        | PL(L) | 0.50 | <0.17 | 0.73 | <0.5 | <0.5 |
|                        | YT(L) | <0.5 | 0.19  | 0.59 | <0.5 | <0.5 |
|                        | WH(S) | 1.11 | <0.17 | <0.5 | <0.5 | <0.5 |
| <i>Neverita didyma</i> | DL    | 0.82 | 0.83  | 0.87 | <0.5 | <0.5 |
|                        | BDH   | 0.96 | 4.33  | <0.5 | 0.55 | <0.5 |
|                        | TJ    | 0.85 | 0.23  | 1.00 | <0.5 | <0.5 |
|                        | SG    | 5.12 | 0.33  | <0.5 | <0.5 | <0.5 |
|                        | PL    | 0.98 | 0.68  | 1.51 | <0.5 | 0.50 |
|                        | YT    | <0.5 | 0.29  | <0.5 | <0.5 | 0.66 |
|                        | WH    | <0.5 | 0.47  | <0.5 | <0.5 | <0.5 |
| <i>Mytilus edulis</i>  | YK    | <0.5 | <0.17 | <0.5 | <0.5 | <0.5 |
|                        | HLD   | 12.2 | <0.17 | 3.00 | 1.74 | <0.5 |
|                        | BDH   | <0.5 | 0.54  | 0.52 | <0.5 | <0.5 |
|                        | TJ    | 3.06 | 0.28  | 3.32 | 0.50 | <0.5 |
|                        | PL    | 1.43 | 0.24  | 0.75 | <0.5 | <0.5 |
|                        | YT    | 2.58 | <0.17 | 1.20 | <0.5 | <0.5 |
|                        | WH    | 1.35 | <0.17 | 1.20 | <0.5 | <0.5 |
| <i>Amusium</i>         | DL    | 0.71 | <0.17 | 0.50 | <0.5 | <0.5 |
|                        | YK    | 0.54 | <0.17 | 0.80 | <0.5 | <0.5 |
|                        | HLD   | 0.91 | <0.17 | 0.50 | <0.5 | <0.5 |
|                        | TJ    | 6.22 | <0.17 | 4.00 | 0.82 | <0.5 |
|                        | SG    | 1.06 | 0.18  | 1.00 | <0.5 | <0.5 |
|                        | PL    | 0.70 | 0.24  | 0.63 | <0.5 | <0.5 |
|                        | YT    | 2.03 | <0.17 | 2.00 | <0.5 | <0.5 |
|                        | WH    | 1.88 | <0.17 | 2.00 | <0.5 | <0.5 |
| <i>Chlamys farreri</i> | DL    | 2.21 | 0.82  | 1.30 | <0.5 | <0.5 |
|                        | SG    | 3.02 | 0.74  | 1.50 | 0.56 | <0.5 |
|                        | PL    | 1.59 | <0.17 | 0.66 | <0.5 | <0.5 |
|                        | YT    | 1.00 | 0.35  | <0.5 | <0.5 | <0.5 |
|                        | WH    | 1.49 | 0.33  | <0.5 | <0.5 | <0.5 |
| <i>Macra</i>           | DL    | 1.32 | 0.96  | 1.02 | <0.5 | <0.5 |

|                  |     |      |       |      |      |      |
|------------------|-----|------|-------|------|------|------|
| <i>chinensis</i> |     |      |       |      |      |      |
|                  | HLD | <0.5 | 0.59  | <0.5 | <0.5 | <0.5 |
|                  | PL  | 2.30 | 0.68  | 1.23 | <0.5 | <0.5 |
|                  | YT  | <0.5 | 0.58  | 0.89 | <0.5 | <0.5 |
| Mya              | DL  | 1.06 | <0.17 | 1.00 | <0.5 | <0.5 |
|                  | HLD | <0.5 | <0.17 | <0.5 | <0.5 | <0.5 |
|                  | BDH | 0.62 | <0.17 | <0.5 | <0.5 | <0.5 |
|                  | TJ  | <0.5 | <0.17 | <0.5 | <0.5 | <0.5 |
|                  | YT  | <0.5 | <0.17 | <0.5 | <0.5 | <0.5 |
|                  | WH  | 1.23 | 0.20  | 1.30 | <0.5 | <0.5 |

---
